# Supplementary material
Source: PubMed Central journal article supplement (PMC3542475)

# Supporting Information

## **Increased Selectivity towards Cytoplasmic *versus* Mitochondrial Ribosome Confers Improved Efficiency of Synthetic Aminoglycosides in Fixing Damaged Genes: A Strategy for Treatment of Genetic Diseases Caused by Nonsense Mutations**

Jeyakumar Kandasamy <sup>†,‡</sup>, Dana Atia-Glikin <sup>†</sup>, Eli Shulman <sup>†</sup>, Katya Shapira, Michal Shavit, Valery Belakhov and Timor Baasov <sup>\*</sup>

The Edith and Joseph Fischer Enzyme Inhibitors Laboratory, Schulich Faculty of Chemistry, Technion - Israel Institute of Technology, Haifa 32000, Israel

\* To whom correspondence should be addressed at: Schulich Faculty of Chemistry, Technion-Israel Institute of Technology, Haifa 32000, Israel. E-mail: [chtimor@techunix.technion.ac.il](mailto:chtimor@techunix.technion.ac.il). Phone: (972) 48292590; Fax: (972) 48295703.

### **Content of the Supporting Information (SI)**

|                                                                                                                                                                                                                |    |
|----------------------------------------------------------------------------------------------------------------------------------------------------------------------------------------------------------------|----|
| <b>Table S1.</b> Comparative cell toxicity and antibacterial activity data of gentamicin, G418 and synthetic compounds <b>1-12</b> .....                                                                       | S2 |
| <b>Table S2.</b> Correlation between eukaryotic inhibition of translation ( $IC_{50}^{Euk}$ ) and <i>in vitro</i> readthrough activity at 1.4 $\mu$ M concentration of a series of aminoglycosides tested..... | S3 |
| <b>Figure S1.</b> Semi logarithmic plots representing dose-response effect of standard and synthetic AGs.....                                                                                                  | S4 |
| Purity determination of the novel compounds <b>9-12</b> .....                                                                                                                                                  | S5 |

**Table S1.** Comparative cell toxicity and antibacterial activity data of gentamicin, G418 and synthetic compounds **1-12**<sup>a</sup>

| Aminoglycoside          | Cell toxicity<br>LC <sub>50</sub> (mM) <sup>b</sup> | Antibacterial<br>activity<br>MIC (μM) <sup>c</sup> |
|-------------------------|-----------------------------------------------------|----------------------------------------------------|
| Gentamicin              | 3.2 ± 0.3                                           | <0.75                                              |
| Paromomycin             | 3.1 ± 0.4                                           | 1.2                                                |
| G418                    | 1.6 ± 0.1                                           | <1.25                                              |
| <b>1</b>                | 22.4 ± 0.9                                          | 100                                                |
| <b>2</b>                | 7.0 ± 0.4                                           | 70                                                 |
| <b>3</b>                | 21.3 ± 1.7                                          | 42                                                 |
| <b>4</b>                | 16.3 ± 0.5                                          | 70                                                 |
| ( <i>S</i> )- <b>5</b>  | 21.8 ± 0.5                                          | 83                                                 |
| ( <i>R</i> )- <b>6</b>  | 20.1 ± 0.7                                          | 78                                                 |
| ( <i>S</i> )- <b>7</b>  | 8.1 ± 1.4                                           | 33                                                 |
| ( <i>R</i> )- <b>8</b>  | 19.3 ± 1.5                                          | 33                                                 |
| ( <i>S</i> )- <b>9</b>  | 4.8 ± 0.3                                           | 96                                                 |
| ( <i>R</i> )- <b>10</b> | 7.6 ± 0.2                                           | 96                                                 |
| ( <i>S</i> )- <b>11</b> | 6.5 ± 0.3                                           | 192                                                |
| ( <i>R</i> )- <b>12</b> | 2.8 ± 0.1                                           | 96                                                 |

<sup>a</sup> All tested AGs were in their sulfate salt forms and the concentrations reported refer to that of the free amine form of each AG. All assays were performed in duplicate and analogous results were obtained in at least two or three experiments. <sup>b</sup> Cell toxicity was measured in human foreskin fibroblast (HFF) cells, and calculated as a ratio between the numbers of living cells in cultures grown in the presence of the tested compound, versus cultures grown without compound. The half-maximal lethal concentration (LC<sub>50</sub>) values were obtained from fitting concentration-response curves using GraFit5 software. <sup>c</sup> The minimal inhibitory concentration (MIC) values were measured in *B. subtilis* ATCC6633 and determined by using the double-microdilution method, with two different starting concentrations of each tested compound (384 μg/mL and 6,144 μg/mL).

**Table S2.** Correlation between eukaryotic inhibition of translation ( $IC_{50}^{Euk}$ ) and *in vitro* readthrough activity at 1.4  $\mu$ M concentration of a series of aminoglycosides tested <sup>a</sup>

| Aminoglycoside | $IC_{50}^{Euk}$<br>( $\mu$ M) <sup>b</sup> | R3X <sup>c</sup> | R245X <sup>c</sup> | G542X <sup>c</sup> | W1282X <sup>c</sup> | Q70X <sup>c</sup> | R3381X <sup>c</sup> |
|----------------|--------------------------------------------|------------------|--------------------|--------------------|---------------------|-------------------|---------------------|
| Gentamicin     | 62±9                                       | 0.4              | 0.08               | 0.15               | 0.11                | 0.12              | 0.12                |
| Paromomycin    | 57±4                                       | 0.6              | 0.112              | 0.11               | 0.15                | 0.16              | 0.13                |
| <b>1</b>       | 31±4                                       | 0.2              | 0.072              | 0.09               | 0.09                | 0.09              | 0.07                |
| (R)- <b>6</b>  | 28±1.1                                     | 0.3              | 0.068              | 0.05               | 0.07                | 0.13              | 0.22                |
| <b>2</b>       | 24±1                                       | <b>1.85</b>      | 0.23               | 0.21               | 0.35                | 0.17              | 0.2                 |
| <b>3</b>       | 17±0.6                                     | 0.85             | 0.143              | 0.13               | 0.24                | 0.29              | 0.16                |
| (S)- <b>5</b>  | 16±1                                       | 0.95             | 0.132              | 0.09               | 0.15                | 0.2               | 0.4                 |
| (R)- <b>10</b> | 7.96±0.27                                  | 2                | 0.2                | 0.24               | 0.26                | 0.26              | 0.32                |
| (S)- <b>7</b>  | 5.2±0.7                                    | 3.8              | 1.7                | 1.18               | 1.6                 | 0.67              | 1.2                 |
| (R)- <b>8</b>  | 4.6±0.6                                    | 5                | 1.33               | 0.86               | 1.8                 | 0.49              | 0.8                 |
| <b>4</b>       | 2.8±0.3                                    | 2.1              | 1                  | 0.87               | 1.5                 | 0.58              | 0.7                 |
| G418           | 2.0±0.3                                    | 7.3              | 2.6                | 3.6                | 2.4                 | 1.4               | 3.5                 |
| (S)- <b>9</b>  | 1.49±0.08                                  | 7.4              | <b>0.67</b>        | 1.4                | <b>1</b>            | 0.78              | 1.1                 |
| (R)- <b>12</b> | 0.89±0.07                                  | 3.8              | 1.15               | 2                  | 3                   | 1.7               | 1.6                 |
| (S)- <b>11</b> | 0.73±0.07                                  | 6                | 1.2                | 4.4                | 4.2                 | 1.1               | 2.4                 |

<sup>a</sup> In all biological tests, all tested aminoglycosides were in their sulfate salt forms. The concentrations reported refer to that of the free amine form of each aminoglycoside. <sup>b</sup> Eukaryotic translation inhibition ( $IC_{50}^{Euk}$  values) was quantified as described in the experimental part. <sup>c</sup> *In vitro* stop codon suppression levels are at a single concentration, 1.4  $\mu$ M, of each compound tested and were taken from the data in Fig. 3 and 4. All the experiments were performed in duplicates and analogous results were obtained in three different experiments. The exceptional data points are labeled in red.

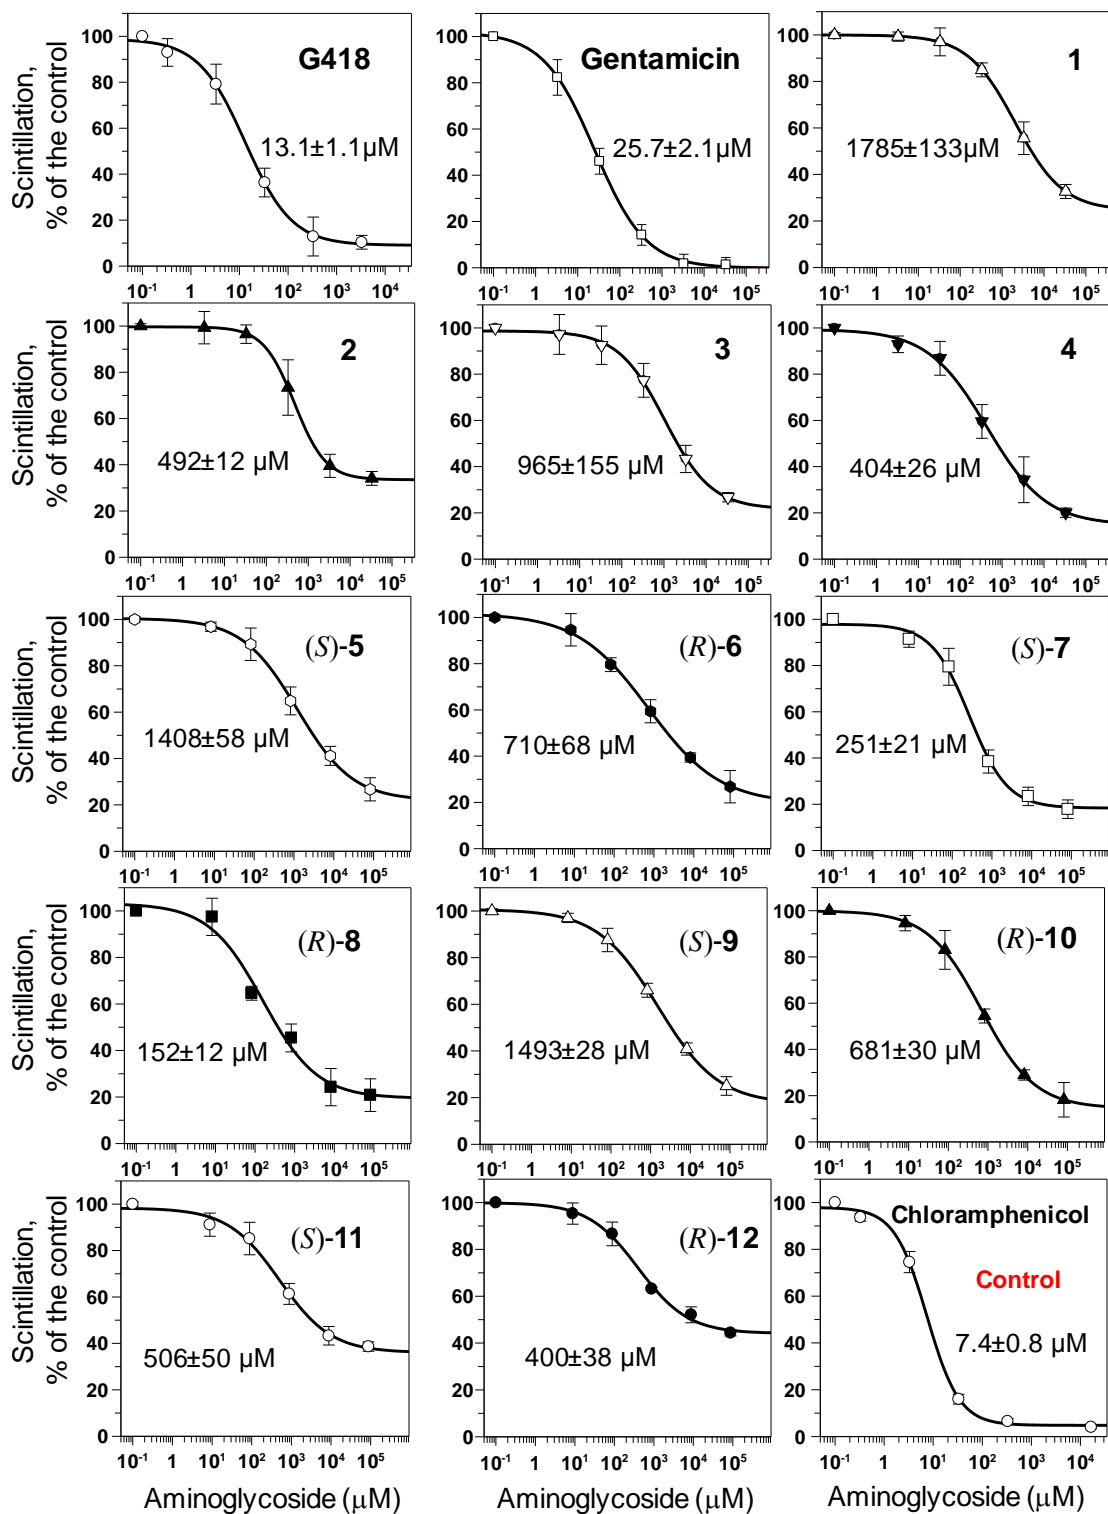

**Figure S1.** Semi logarithmic plots representing dose-response effect of G418, gentamicin, **1**, **2**, **3**, **4**, (*S*)-**5**, (*R*)-**6**, (*S*)-**7**, (*R*)-**8**, (*S*)-**9**, (*R*)-**10**, (*S*)-**11** and (*R*)-**12** on the inhibition of intact mitochondrial protein translation. Chloramphenicol was used as a control and is highlighted in red. The results are averages of at least three independent experiments.

### Purity determination of the novel compounds 9-12.

Purity of the new compounds **9-12** were determined by using HPLC-ESI-MS analysis. The chromatographic separation of all the compounds was achieved by using the HPLC system (Acquity UPLC, Waters) and a 1.7 $\mu$  (50 mm x 2.1 mm) column (Phenomenex Finetex Hilic). Sample aliquots of 3  $\mu$ L were injected onto the column at a flow-rate of 300  $\mu$ L/min. The HPLC separation conditions and the MS data (LCT Premier mass spectrometer, Waters) were as follow:

HPLC-ESI-MS conditions:

| Time Duration (min) | 0.1% Formic acid in Acetonitrile (%) | 30mM ammonium formate pH=3.5 in Water (%) |
|---------------------|--------------------------------------|-------------------------------------------|
| 0                   | 75                                   | 25                                        |
| 3                   | 75                                   | 25                                        |
| 7                   | 50                                   | 50                                        |
| 10                  | 50                                   | 50                                        |
| 11                  | 75                                   | 25                                        |
| 15                  | 75                                   | 25                                        |

Retention time, purity and HRMS data:

| Compound                | Retention Time (min) | Purity (%) | HRMS (m/z) |
|-------------------------|----------------------|------------|------------|
| ( <i>S</i> )- <b>9</b>  | 6.12                 | 99.54      | 483.2667   |
| ( <i>R</i> )- <b>10</b> | 5.89                 | 99.21      | 483.2639   |
| ( <i>S</i> )- <b>11</b> | 7.14                 | 95.21      | 583.3041   |
| ( <i>R</i> )- <b>12</b> | 6.04                 | 97.30      | 584.3124   |

The  $^1\text{H}$  and  $^{13}\text{C}$  NMR spectra, HPLC purification profiles, along with the observed mass spectral analysis data of **9-12** are attached.

$^1\text{H}$  and  $^{13}\text{C}$  NMR spectra of (S)-9 in  $\text{CD}_3\text{OD}$

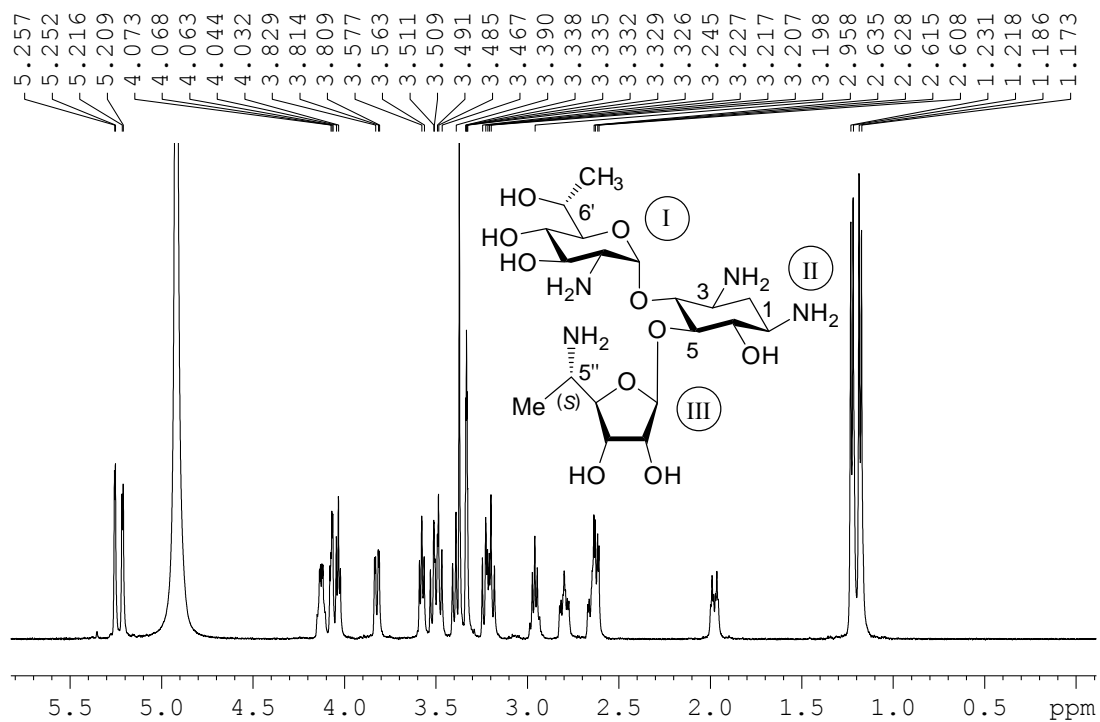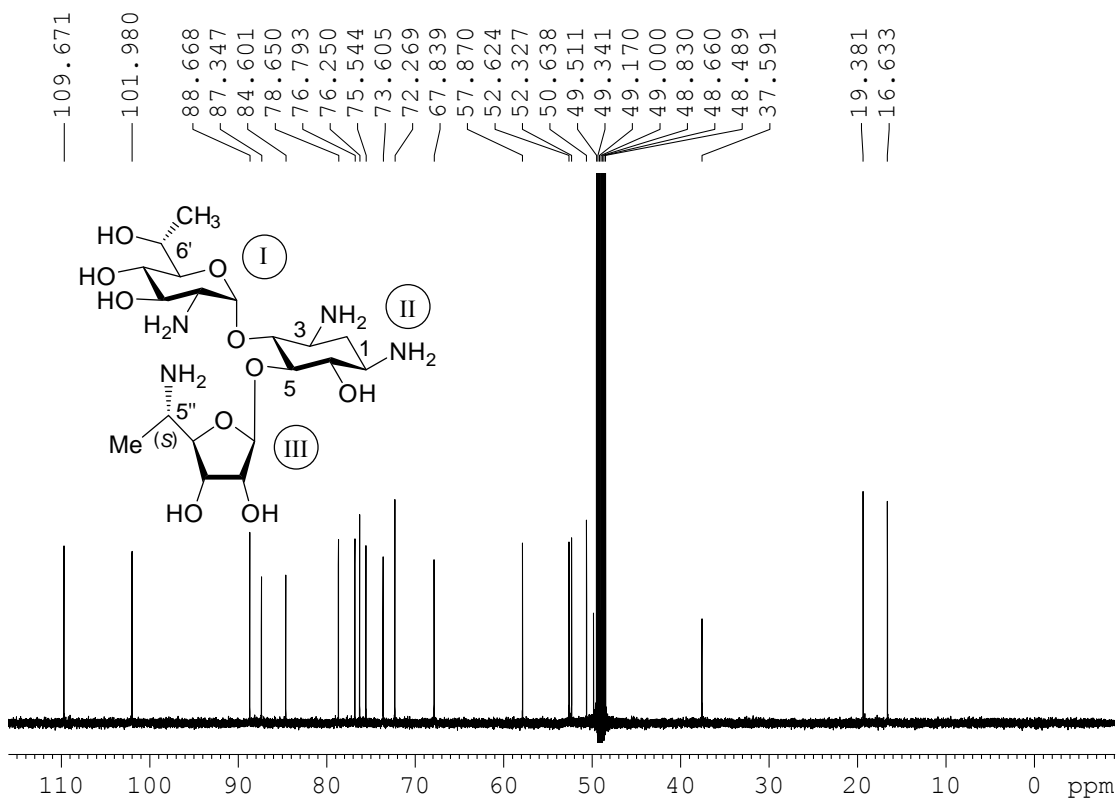

$^1\text{H}$  and  $^{13}\text{C}$  NMR spectra of (*R*)-10 in  $\text{CD}_3\text{OD}$

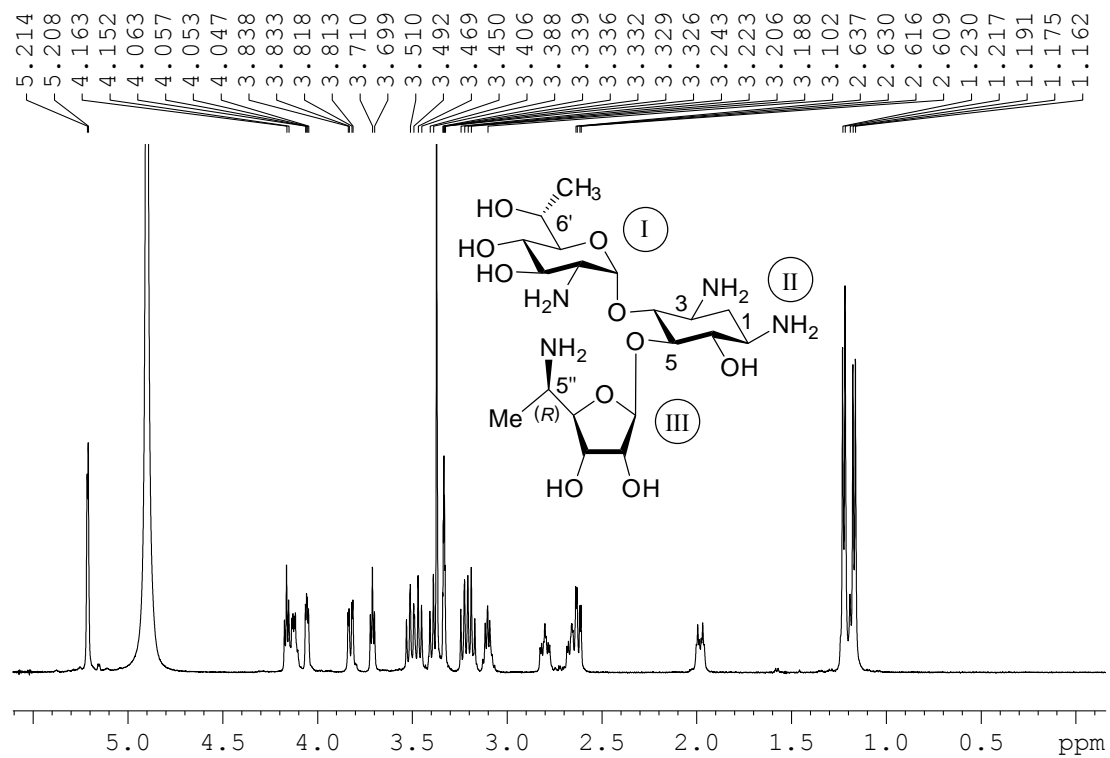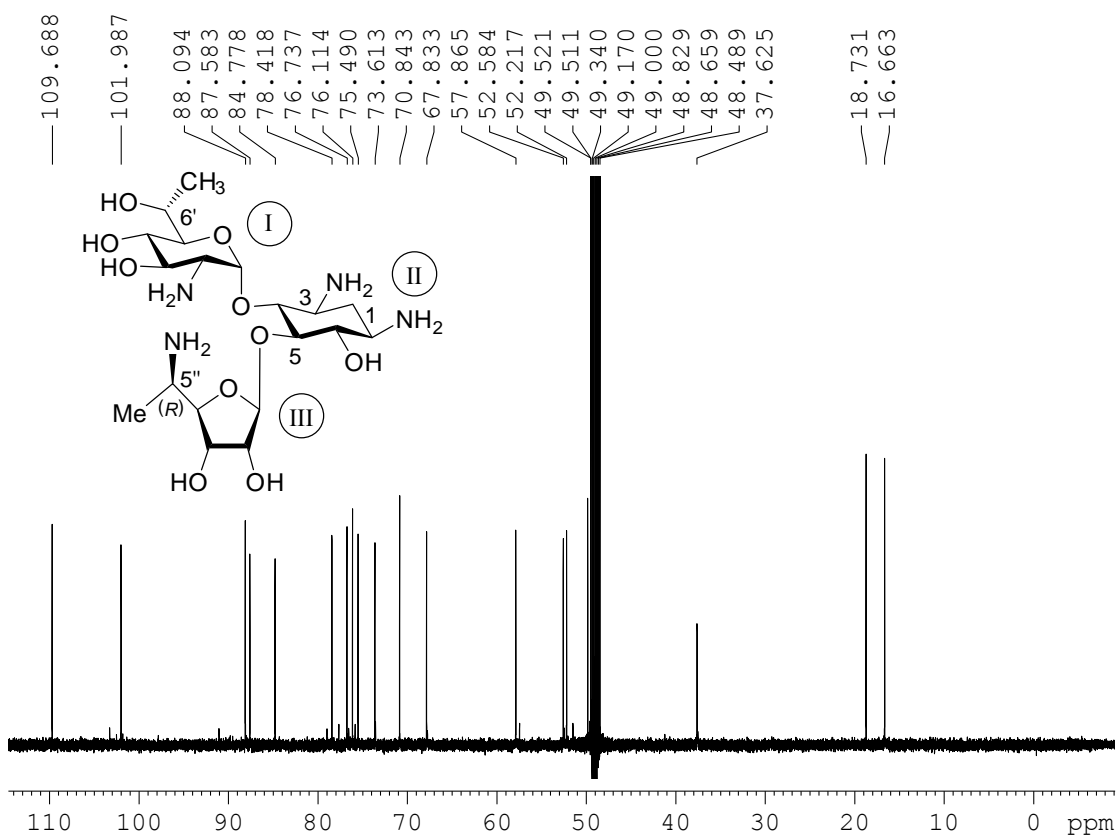

$^1\text{H}$  and  $^{13}\text{C}$  NMR spectra of (S)-11 in  $\text{CD}_3\text{OD}$

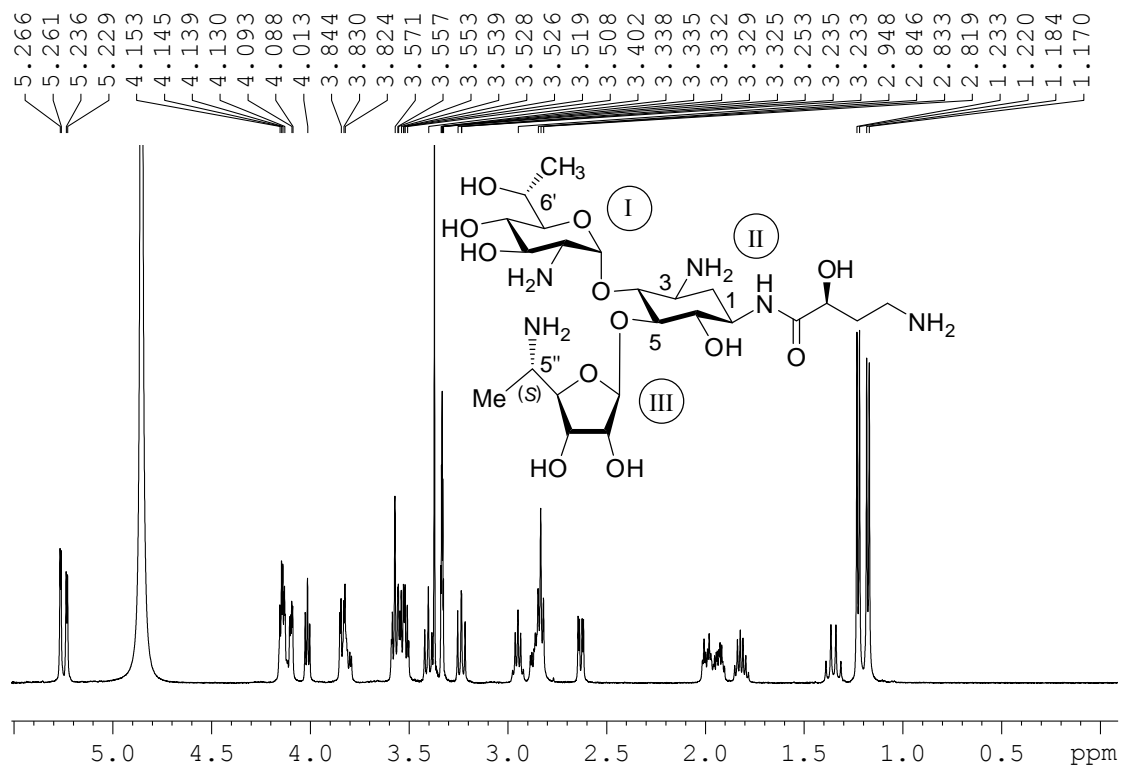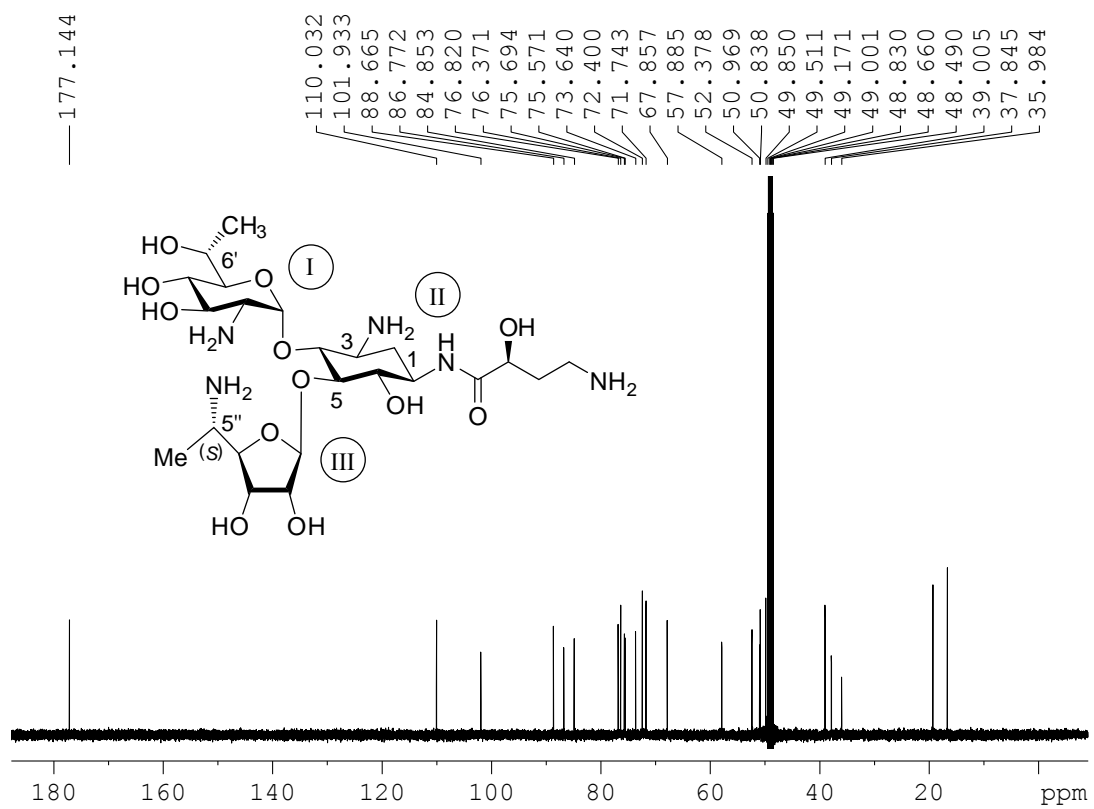



<sup>1</sup>H and <sup>13</sup>C NMR spectra of (*R*)-12 in CD<sub>3</sub>OD

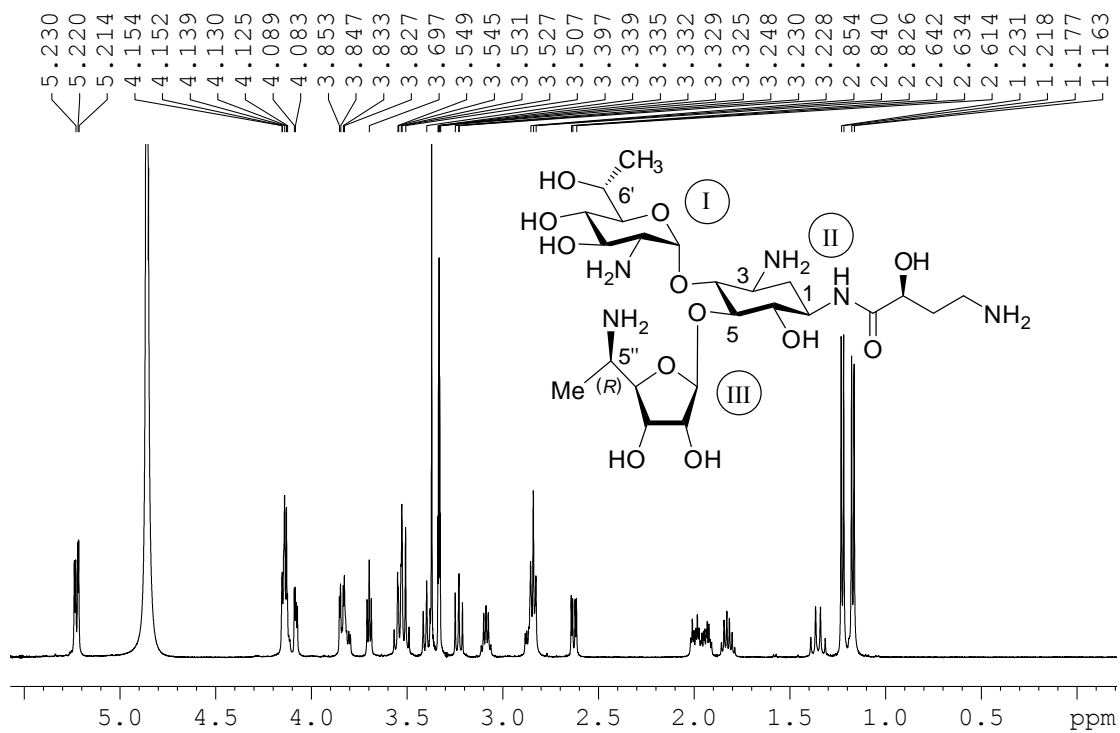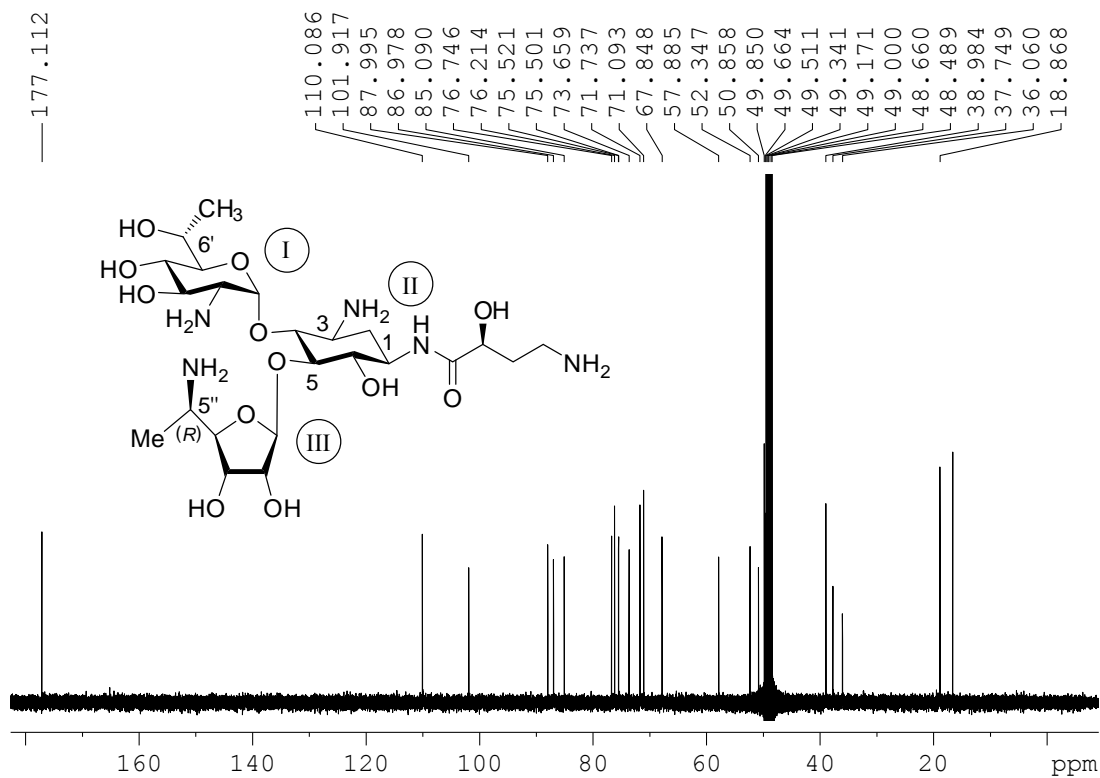

0.3flow 0.1% ACN:0.1M Am.Form pH3.5 (0min- 75:25' 4min\_ 55:45' 8min\_ 55:45' 8min\_ 55:45' column hilic 1.7u flow 1 ACN 0.1% form.acid :H2O

blank2689b Sm (SG, 3x5)

1: TOF MS ES+  
TIC  
1.77e5

Blank

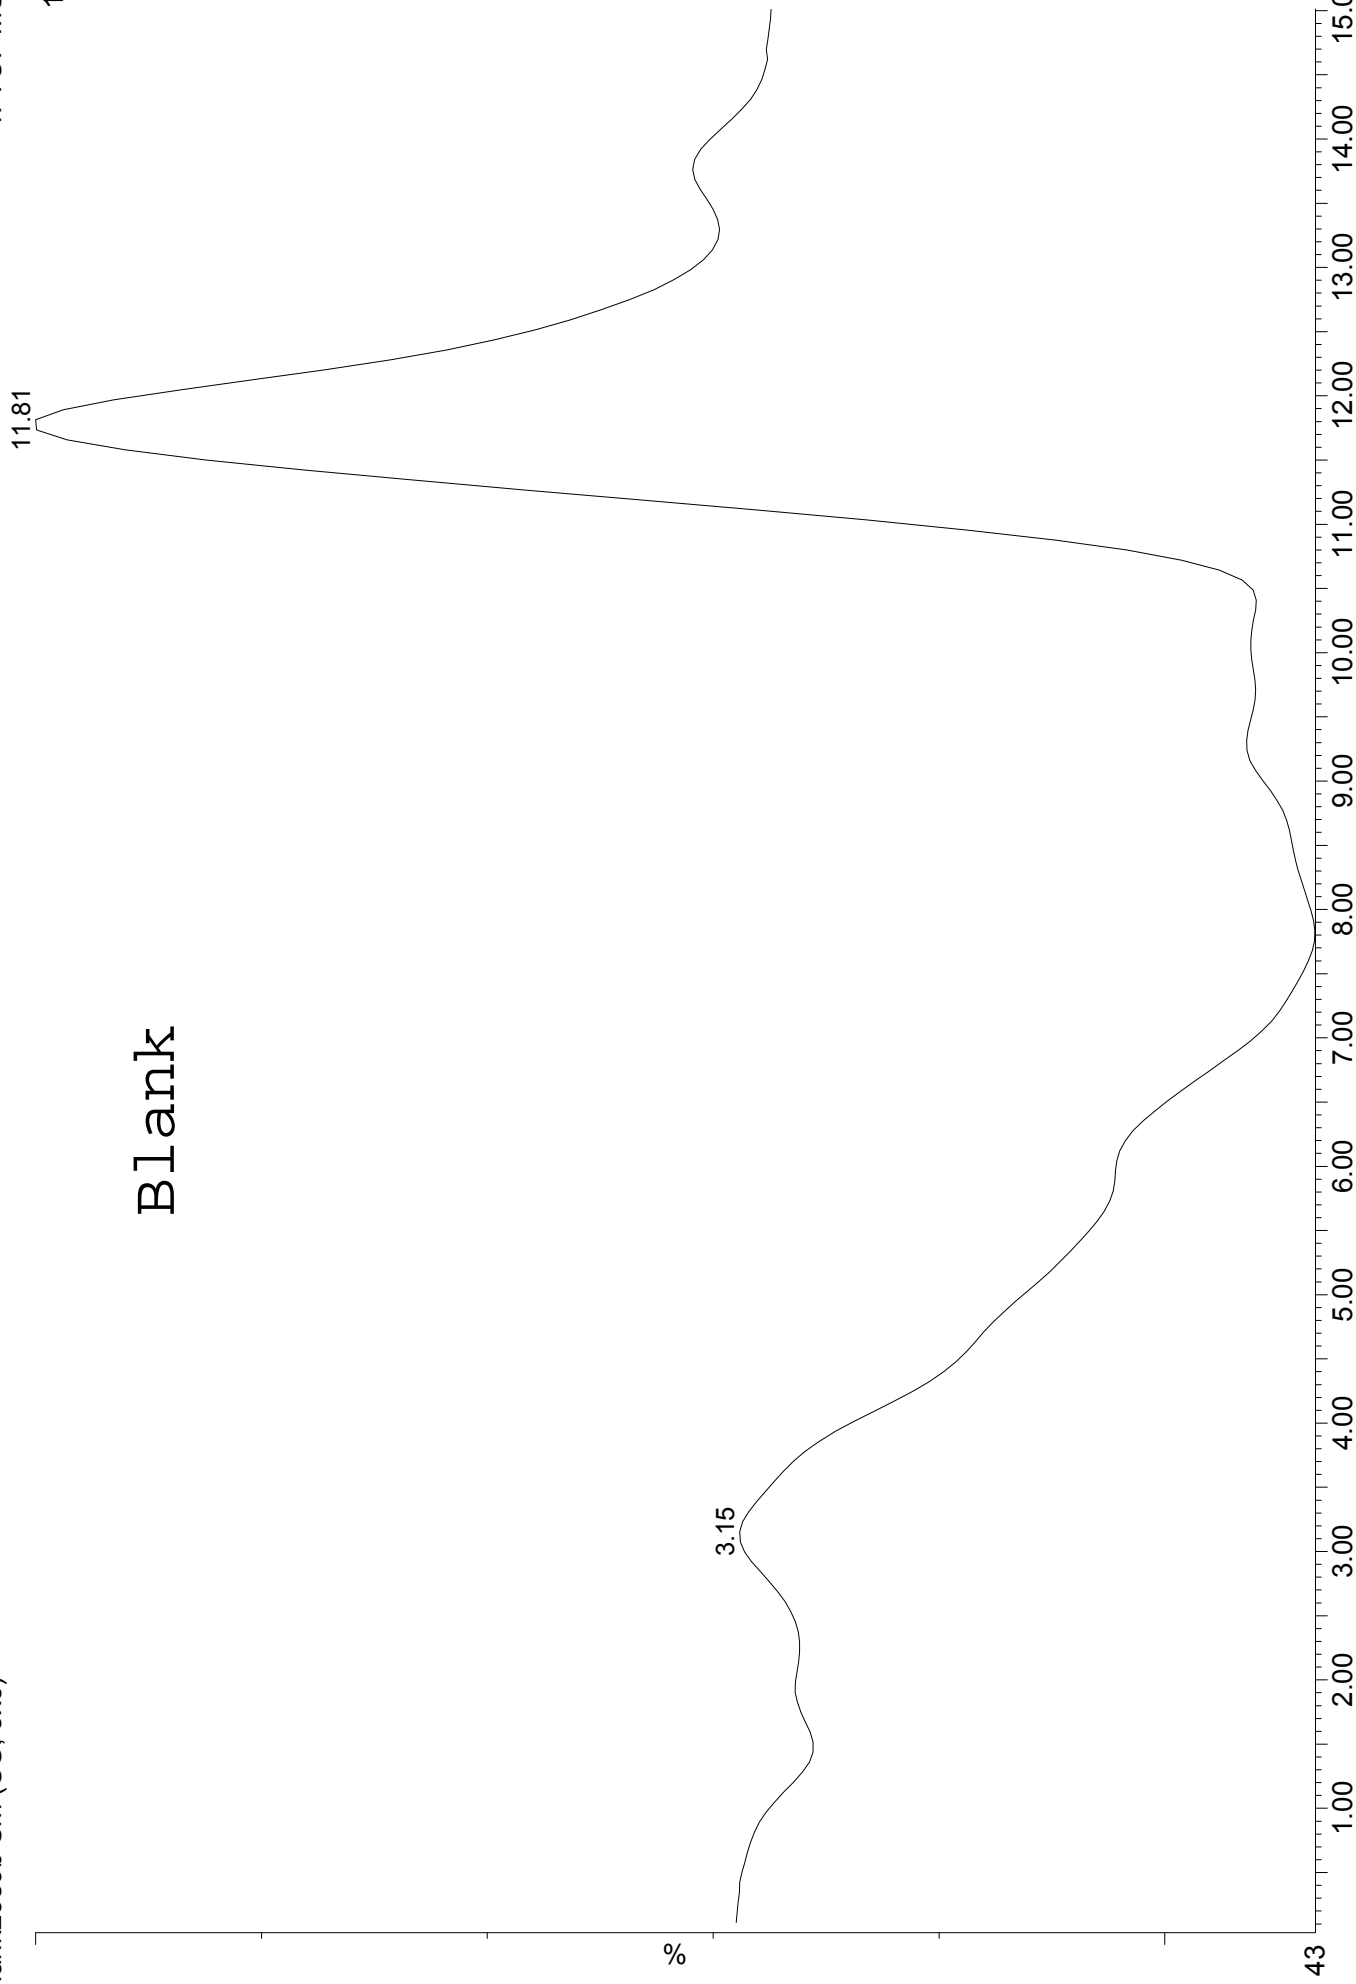

0.3flow 0.1% ACN:0.1M Am.Form pH3.5 (0min- 80:20' 7min\_60:40 ' 8min\_80:20column hilic 1.7u flow 1 ACN 0.1% form.acid :H2O

Ba\_2689\_NB164 Sm (SG, 3x6); Sm (SG, 3x5)

1: TOF MS ES+

6.12;1416037;773578

| Time | Height | Area       | Area% | Area | Area% |
|------|--------|------------|-------|------|-------|
| 3.47 | 8524   | 6546.71    | 0.46  |      |       |
| 6.12 | 773578 | 1416037.25 | 99.54 |      |       |

TIC

9.06e5

Area, Height

Area Area%

Area Area%

Compound S-9

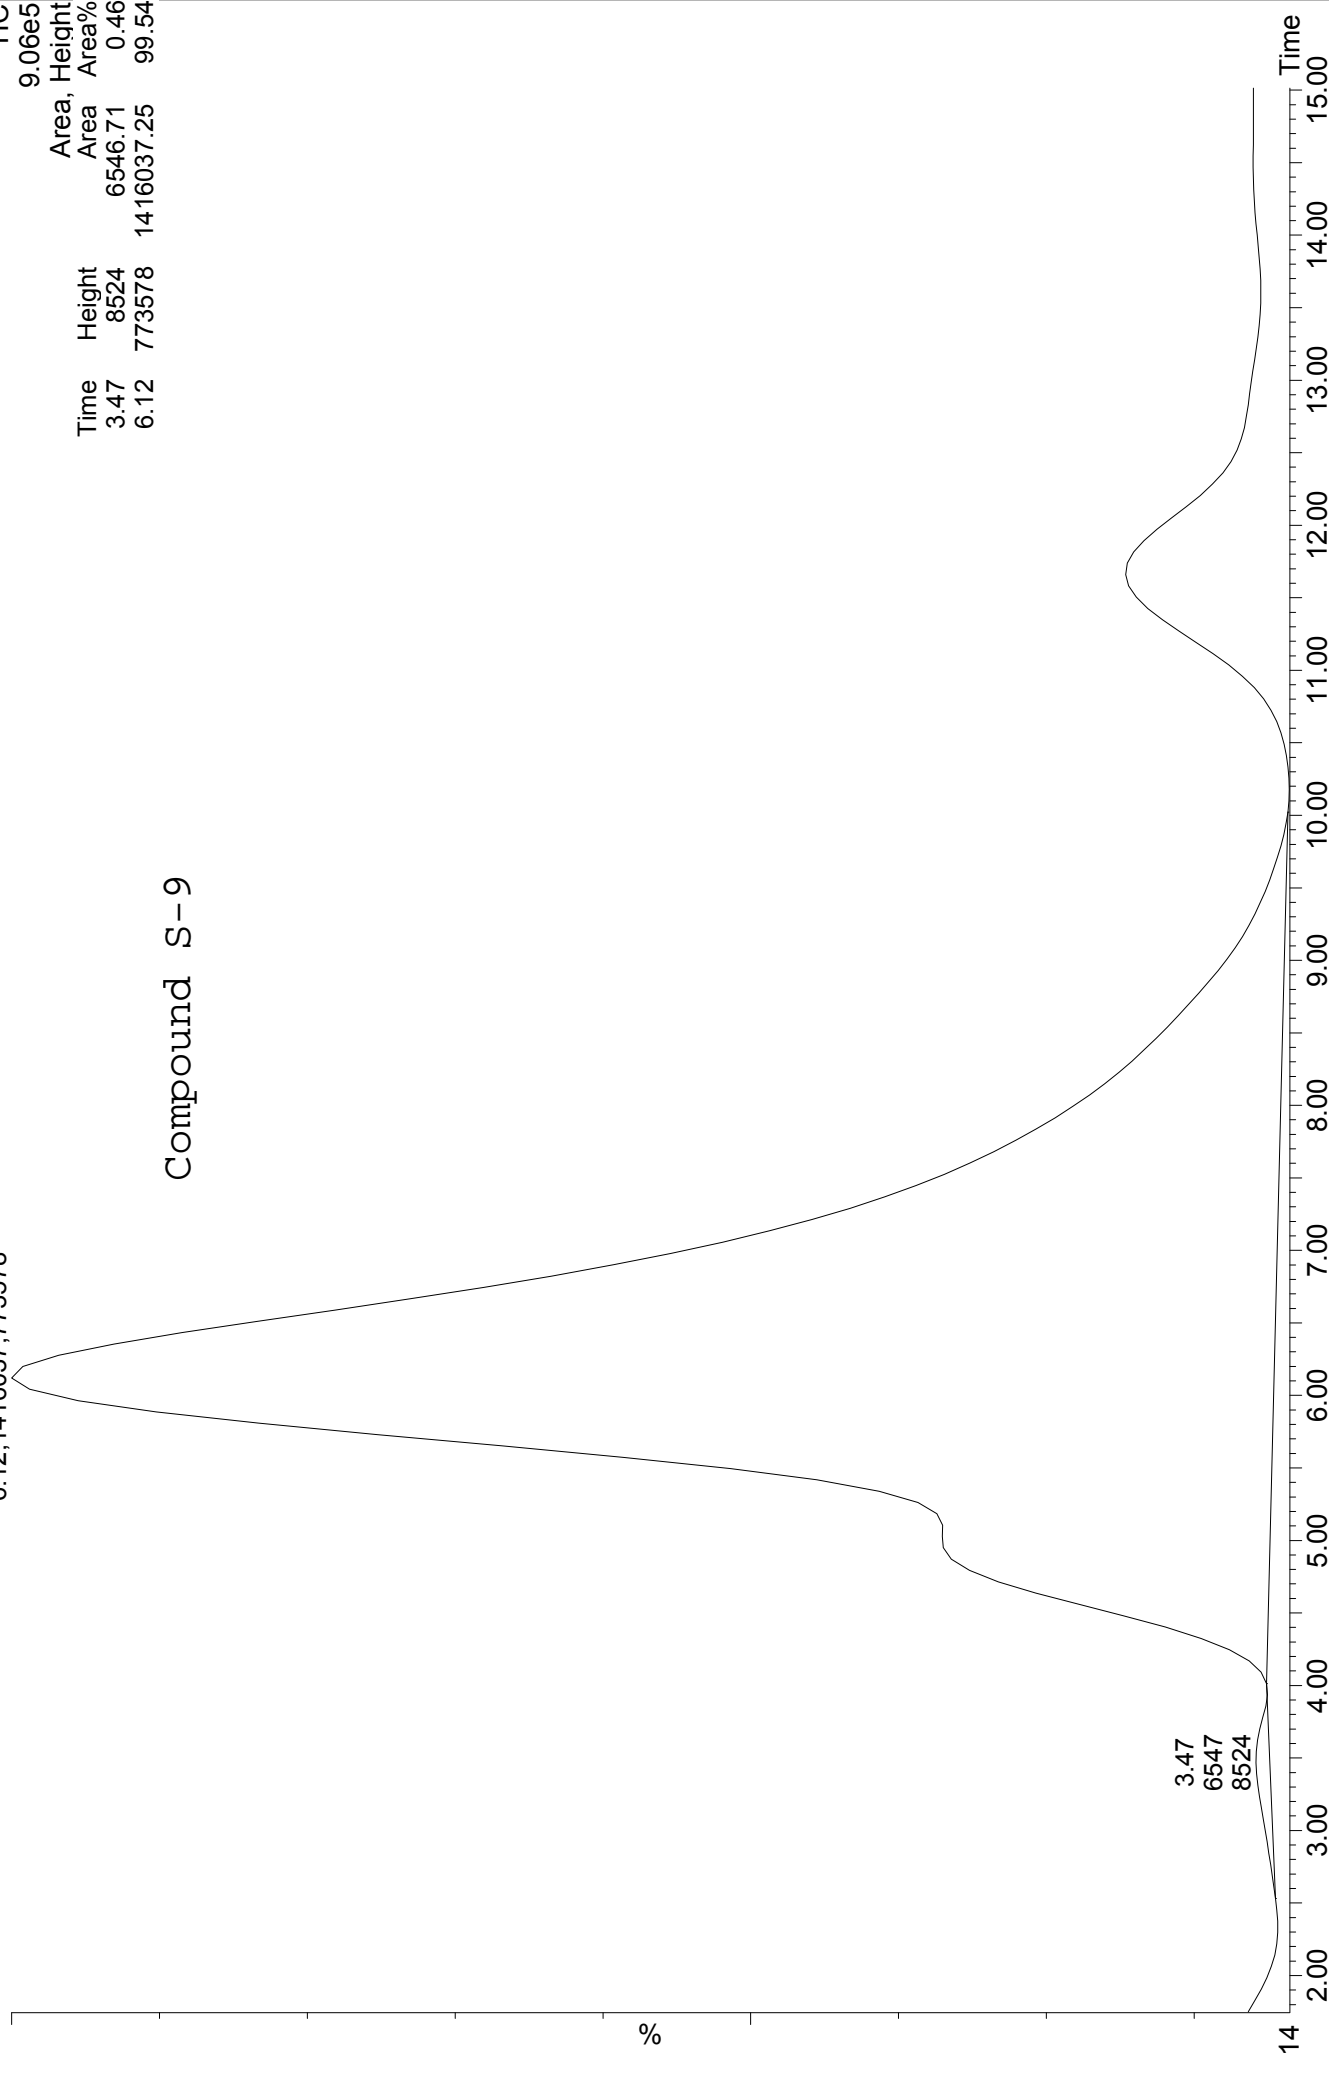

31-Jan-2011

0.3flow 0.1% ACN:0.1M Am.Form pH3.5 (0min- 80:20' 7min\_ 60:40 ' 8min\_ 80:20

Ba\_2689\_NB164 77 (5.964) Cm (74:98-(44:69+113:160))

1: TOF MS ES+  
5.83e6

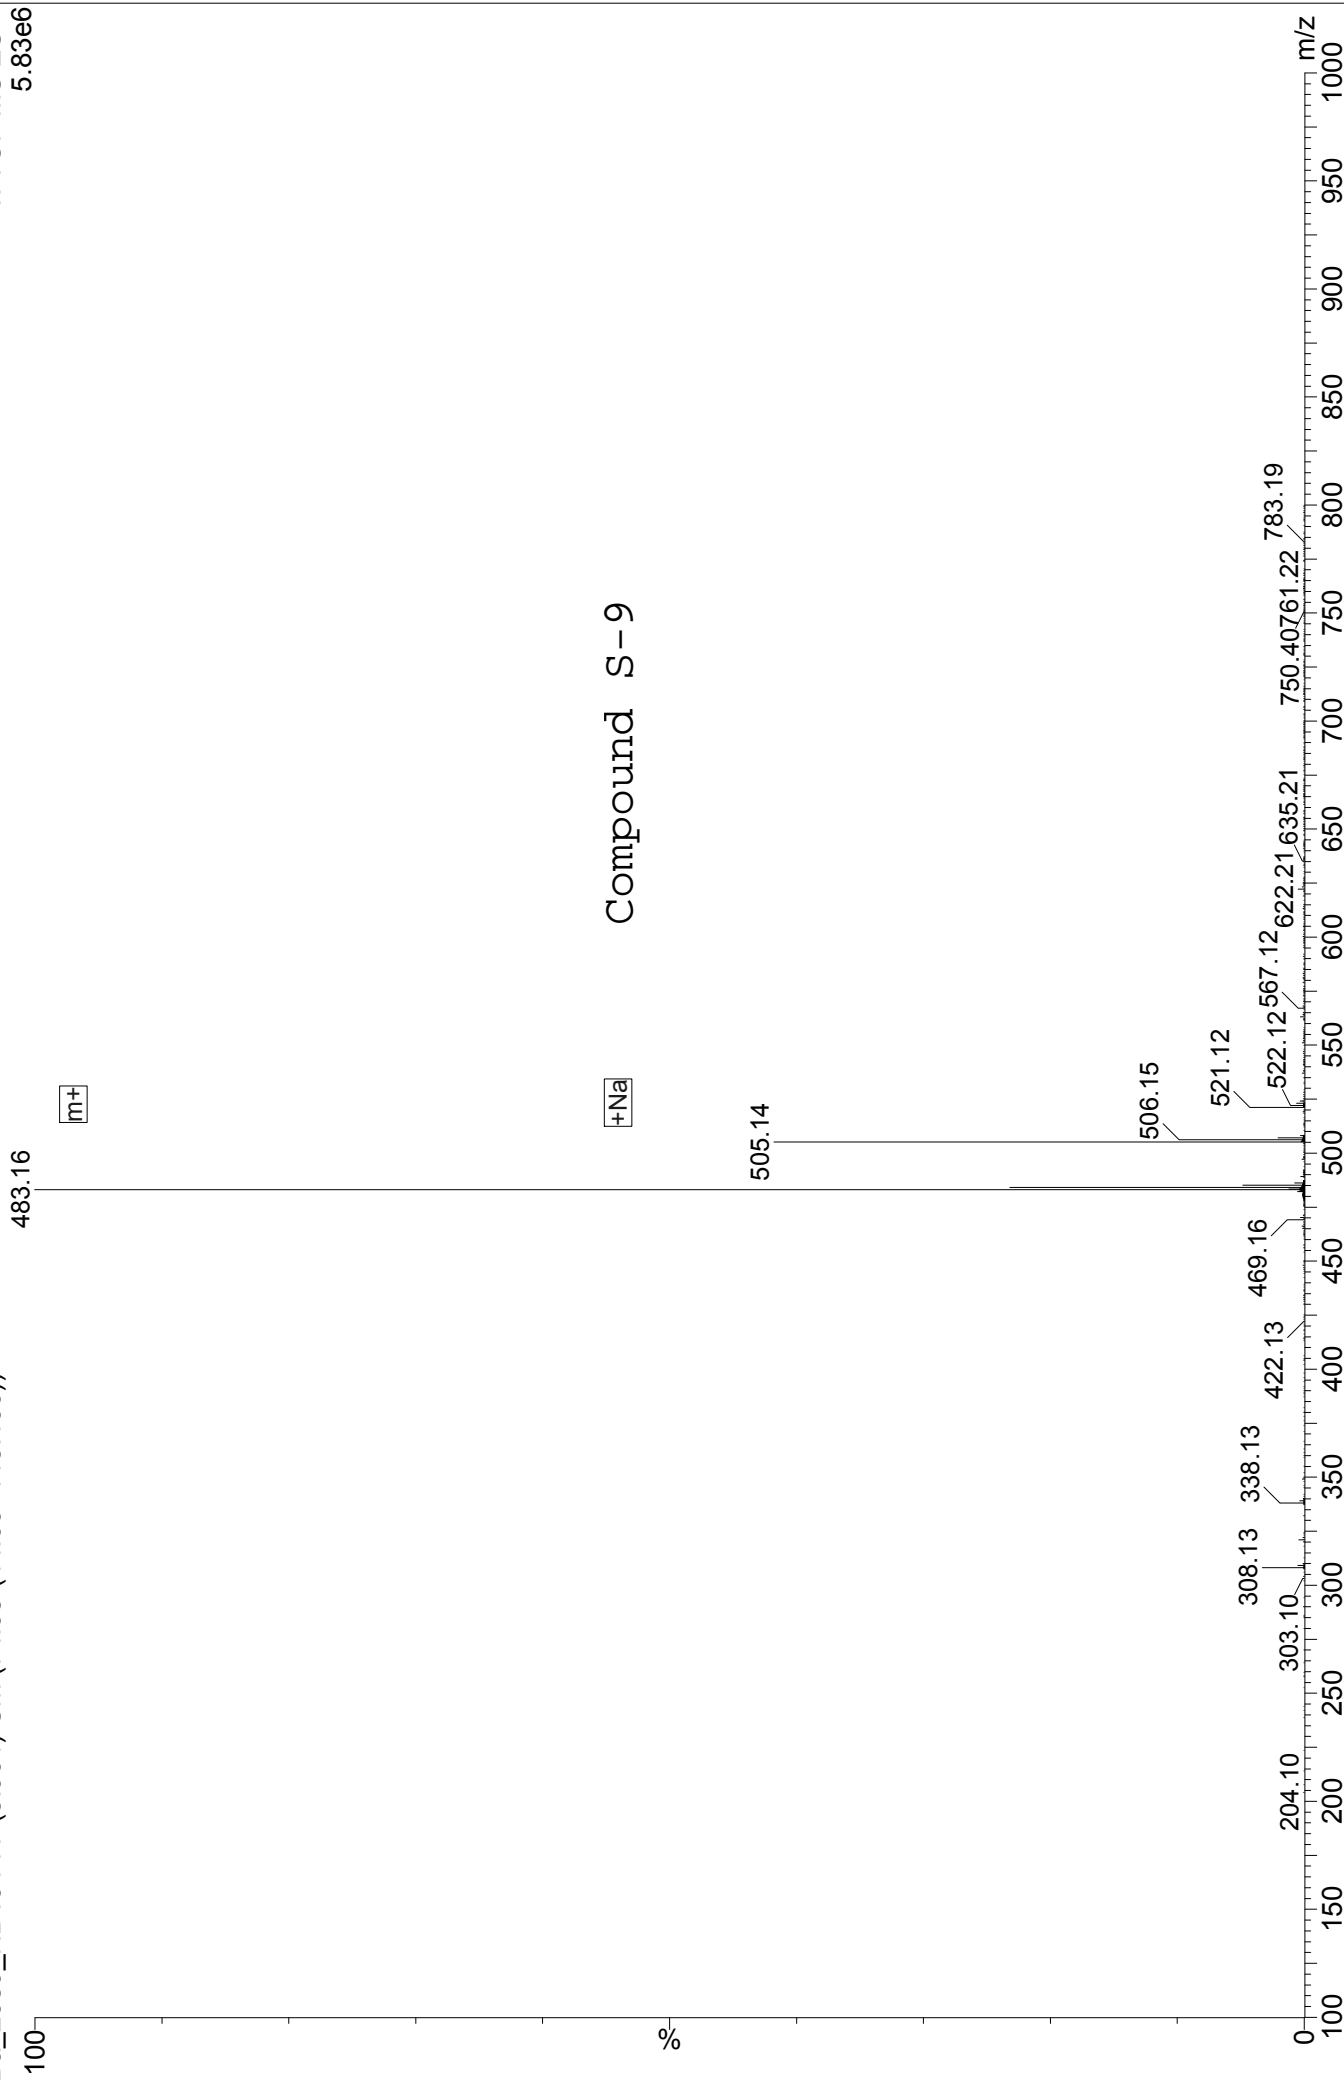

Compound S-9

0.3flow 0.1% ACN:0.1M Am.Form pH3.5 (0min- 80:20' 7min\_60:40 ' 8min\_80:20column hilic 1.7u flow 1 ACN 0.1% form.acid :H2O

Ba\_2689\_NB125 Sm (SG, 3x5); Sm (SG, 3x4)

1: TOF MS ES+

5.89;1898159;960471

| Time | Height | Area       | Area% |
|------|--------|------------|-------|
| 1.67 | 19974  | 15179.86   | 0.79  |
| 5.89 | 960471 | 1898159.13 | 99.21 |

TIC

1.09e6

Area, Height

Area, Area%

Area, Area%

Compound R-10

1.67  
15180  
19974

11

Time

13.00  
14.00

31-Jan-2011

0.3flow 0.1% ACN:0.1M Am.Form pH3.5 (0min- 80:20' 7min\_ 80:20' 8min\_ 80:20

Ba\_2689\_NB125 84 (6.510) Cm (84:106-(40:48+143))

1: TOF MS ES+  
2.98e6

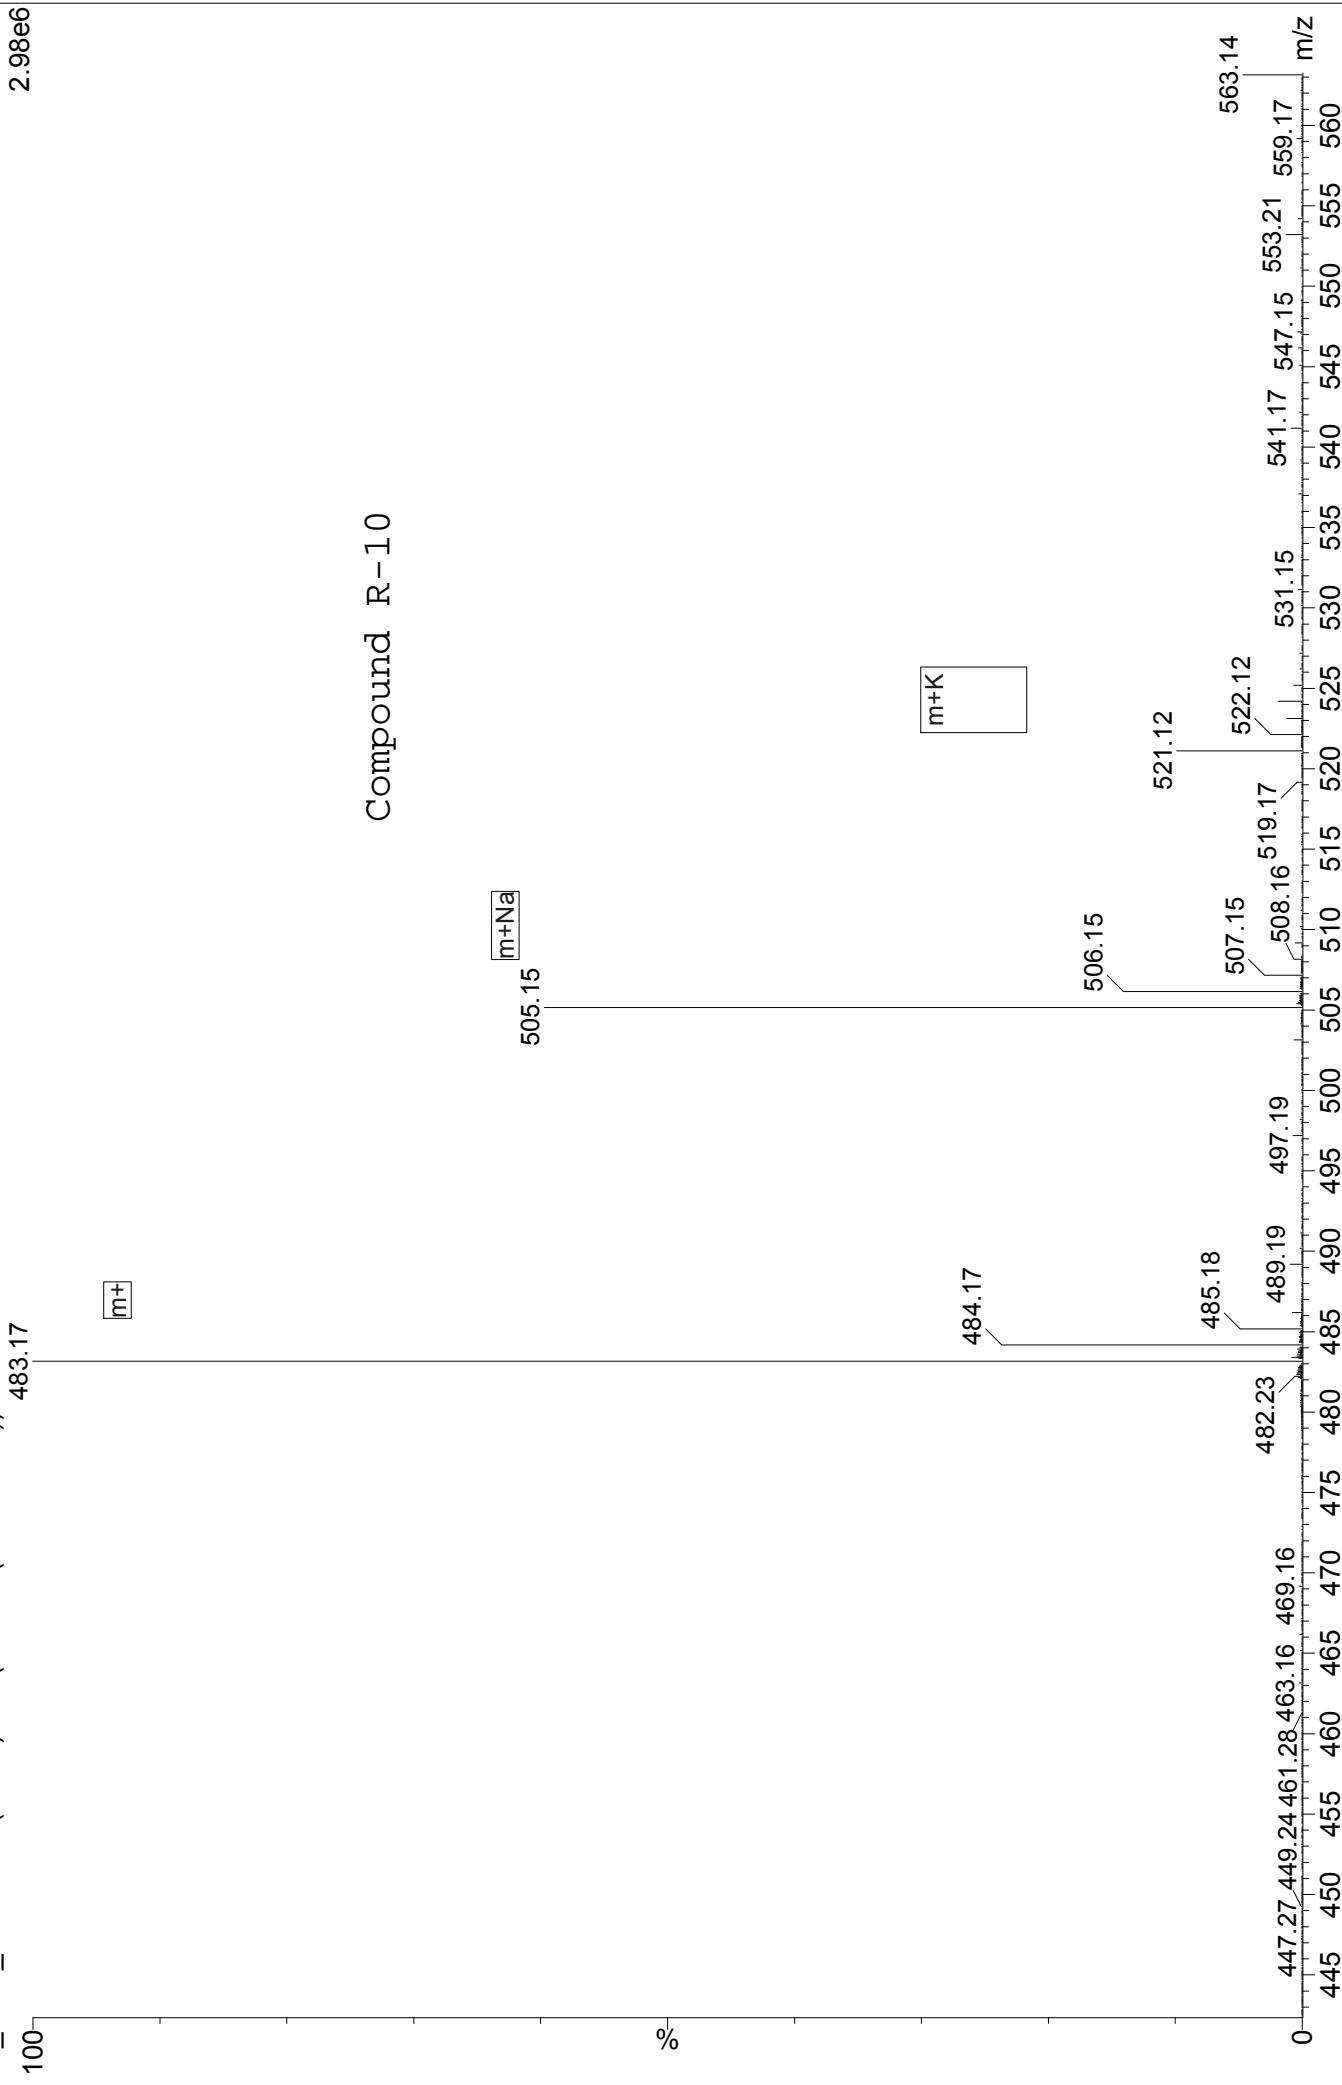

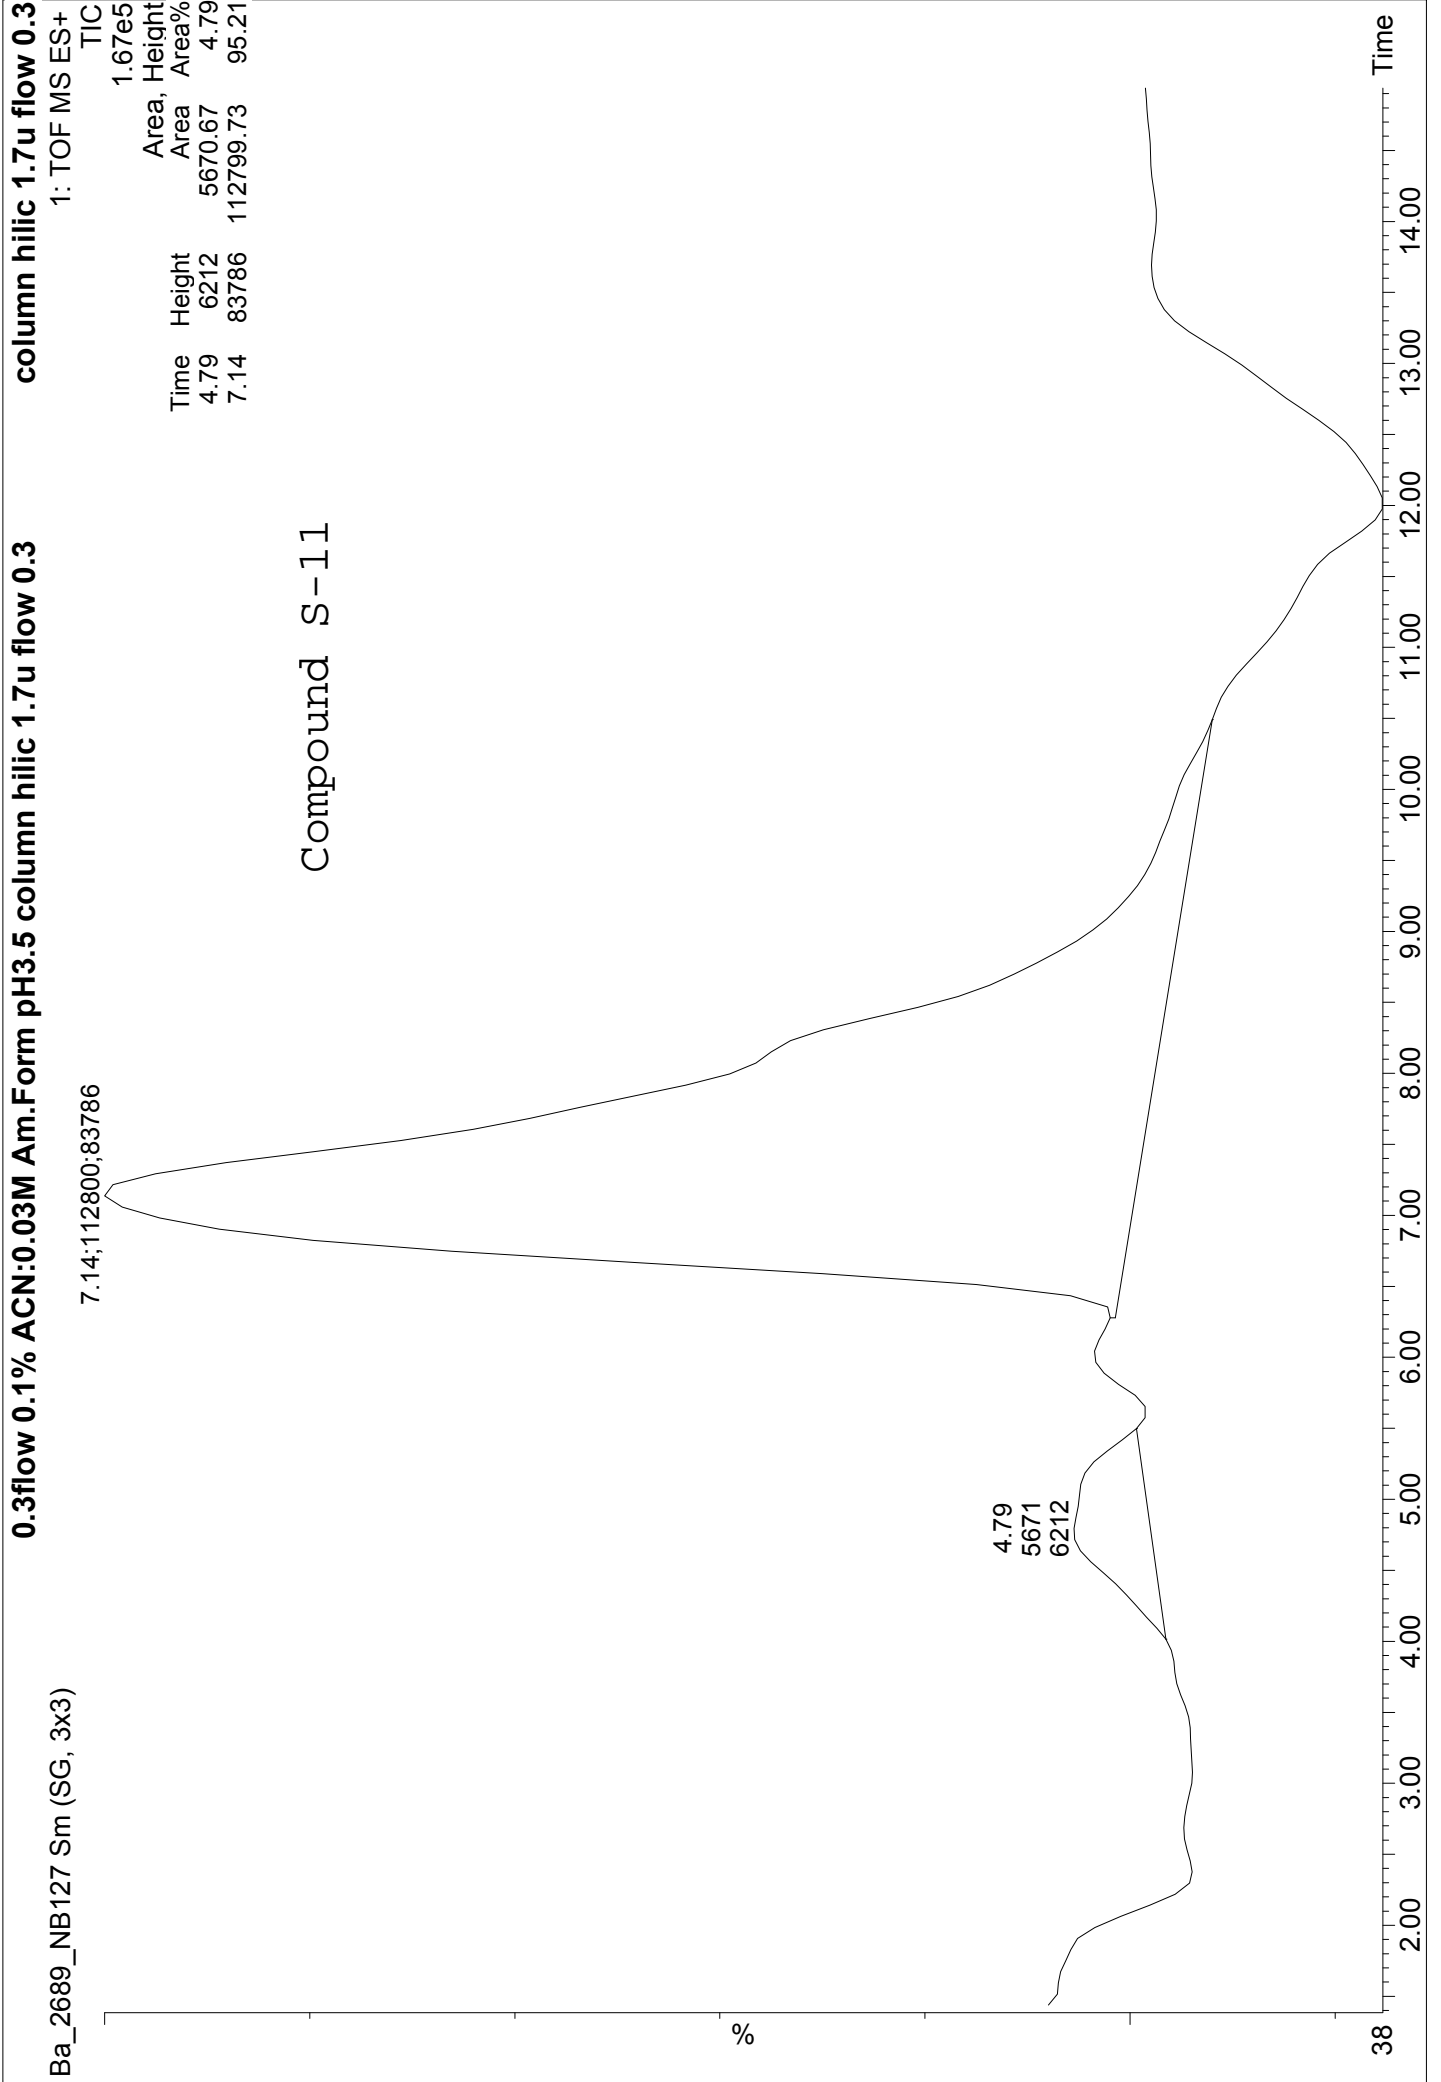

01-Jun-2011

Ba\_2689\_NB127 93 (7.215) Cm (89:111-72:73)

0.3flow 0.1% ACN:0.03M Am.Form pH3.5

column hilic 1.7u flow 0.3

1: TOF MS ES+  
3.62e5

# Compound S-11

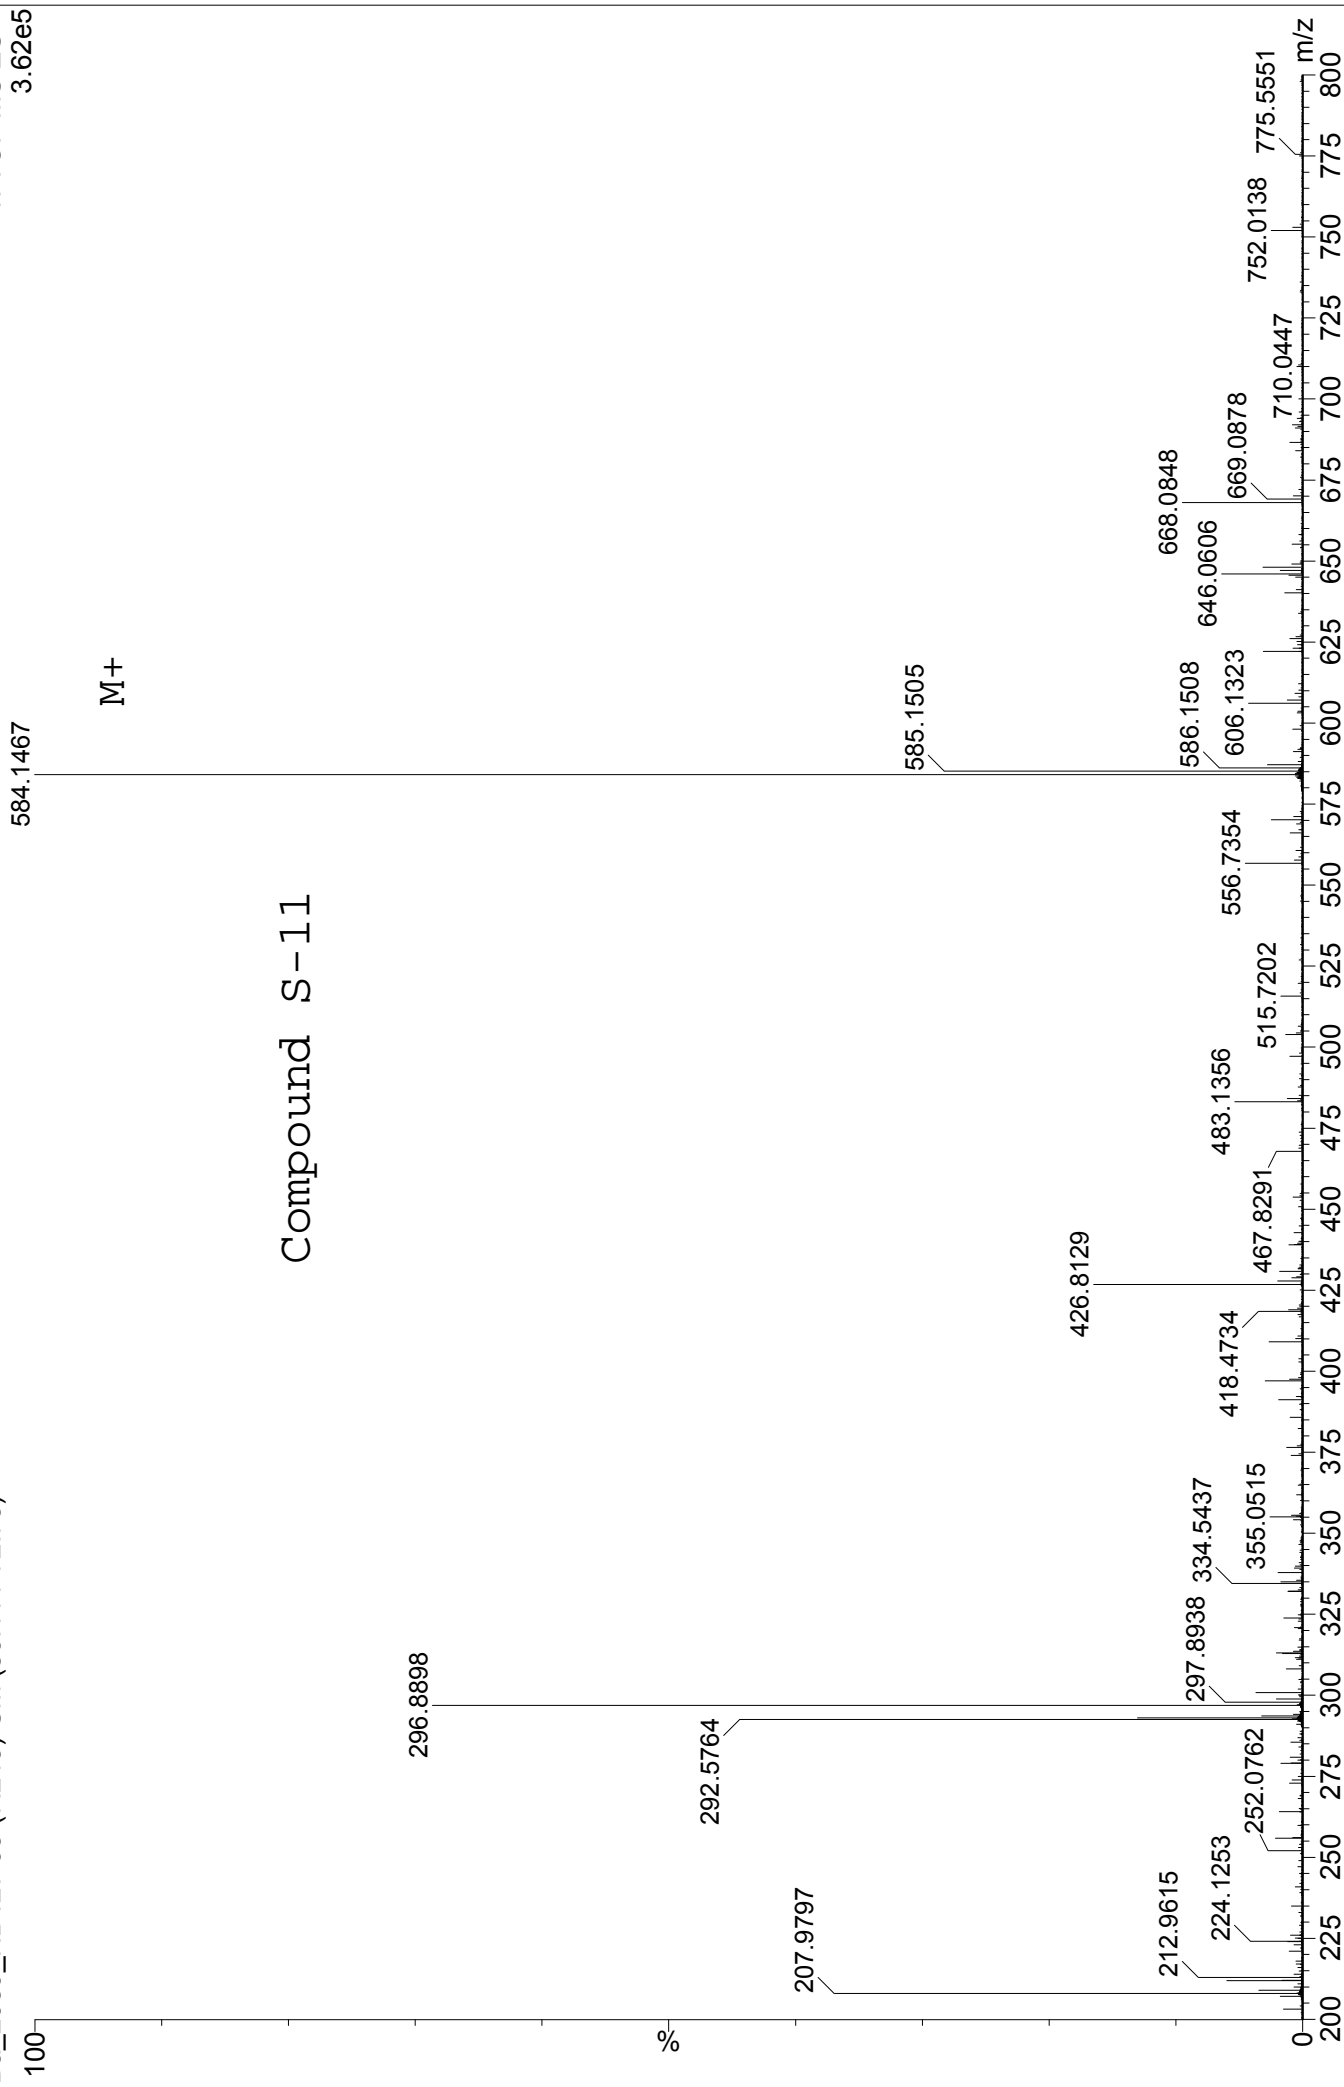



0.3flow 0.1% ACN:0.03M Am.Form pH3.5 column hilic 1.7u flow 0.3  
column hilic 1.7u flow 0.3  
1: TOF MS ES+  
TIC  
4.47e5

Ba\_2689\_NB128A Sm (SG, 3x5); Sm (SG, 3x4); Sm (SG, 3x3)  
6.04;636477;334440

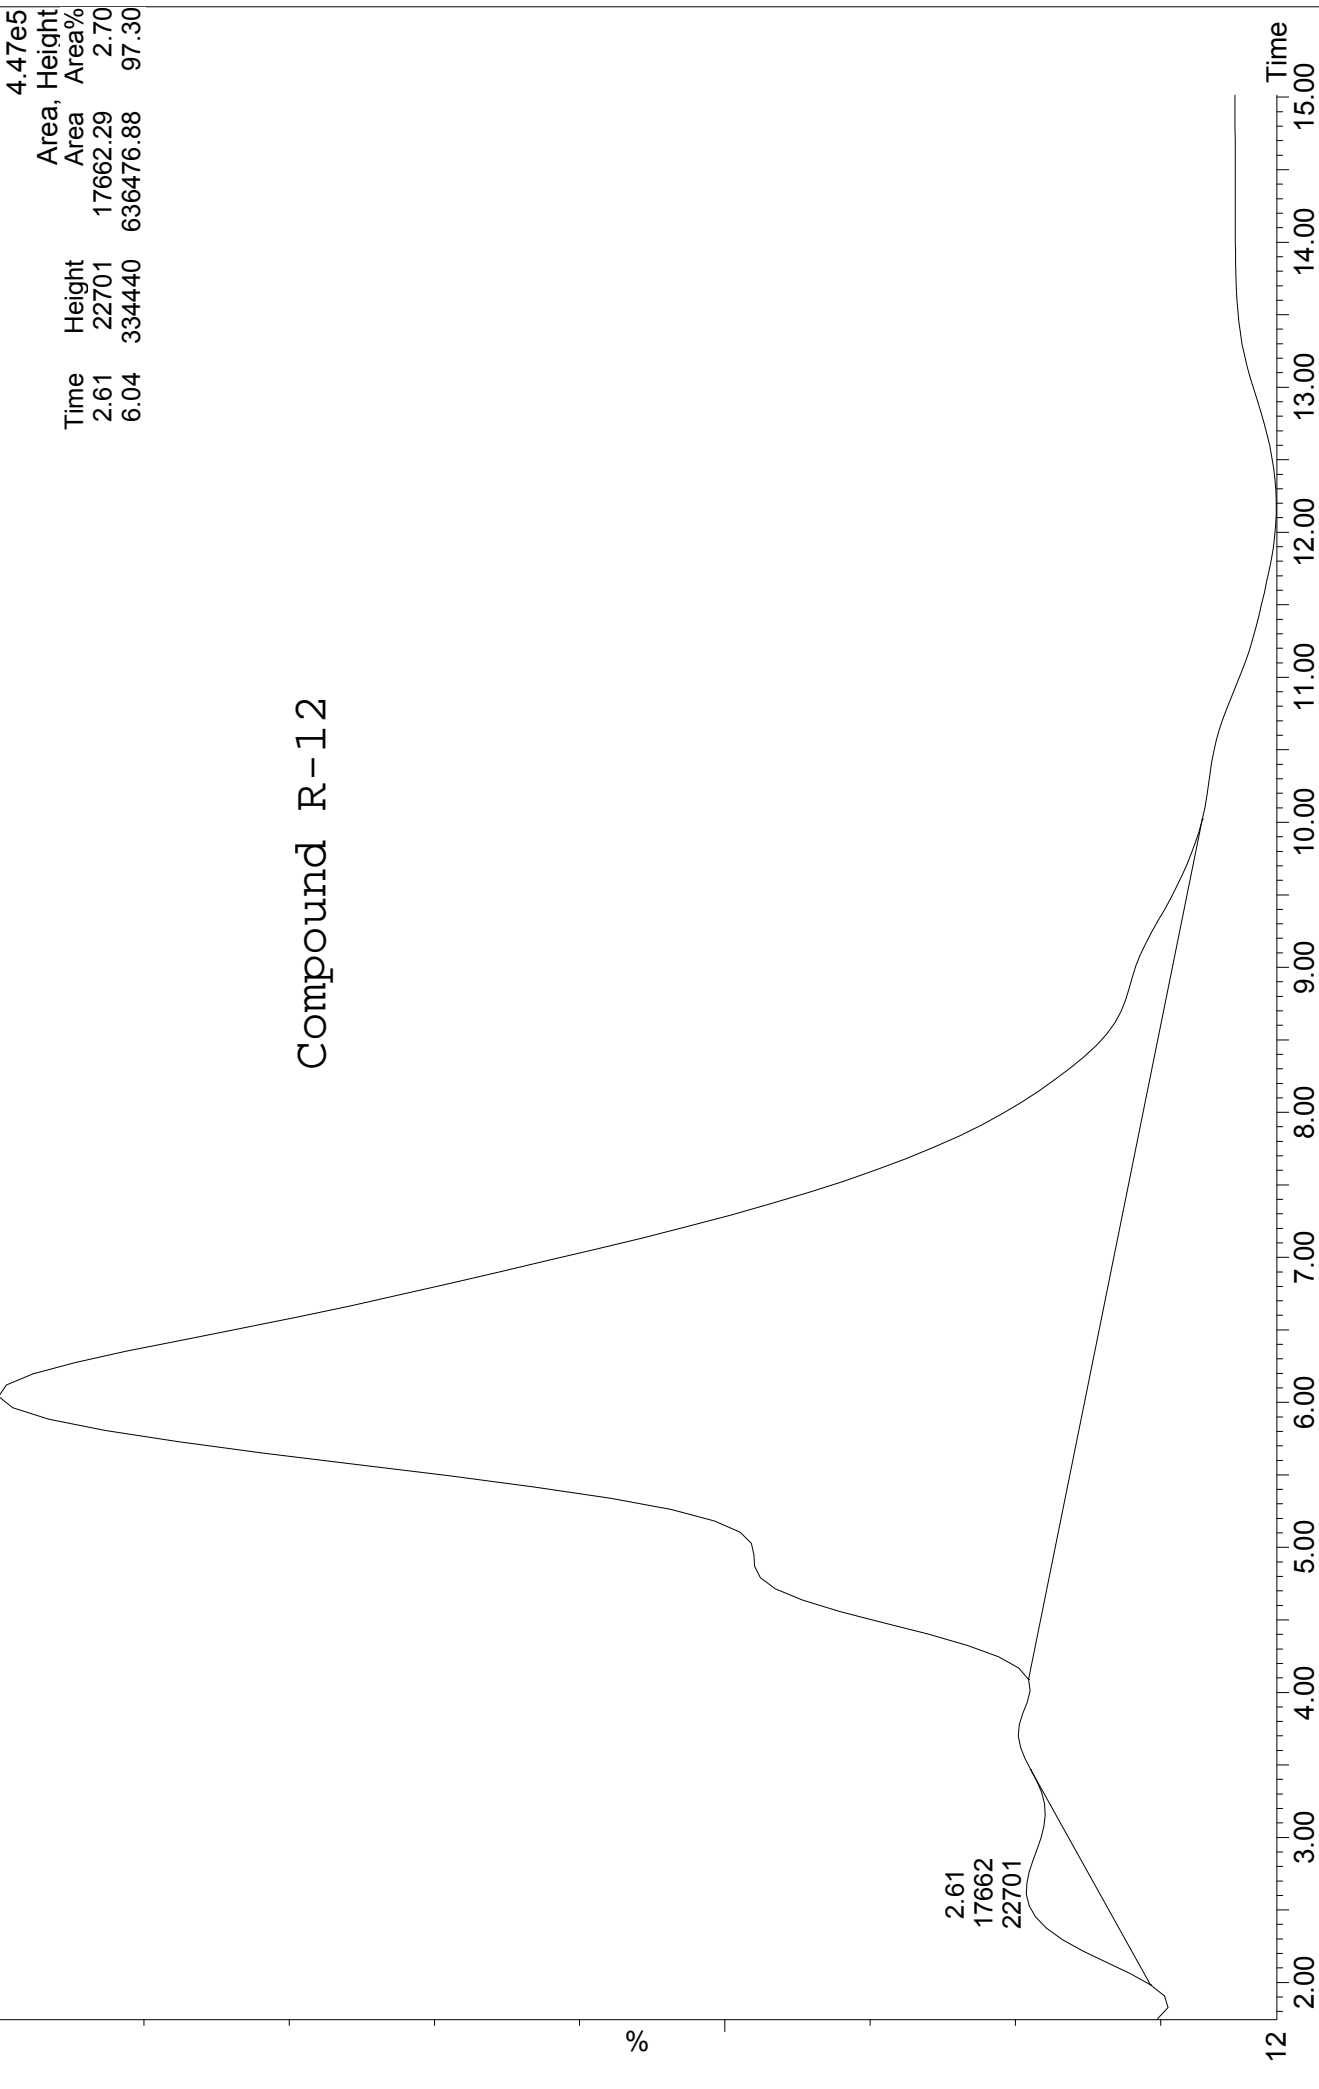

Compound R-12

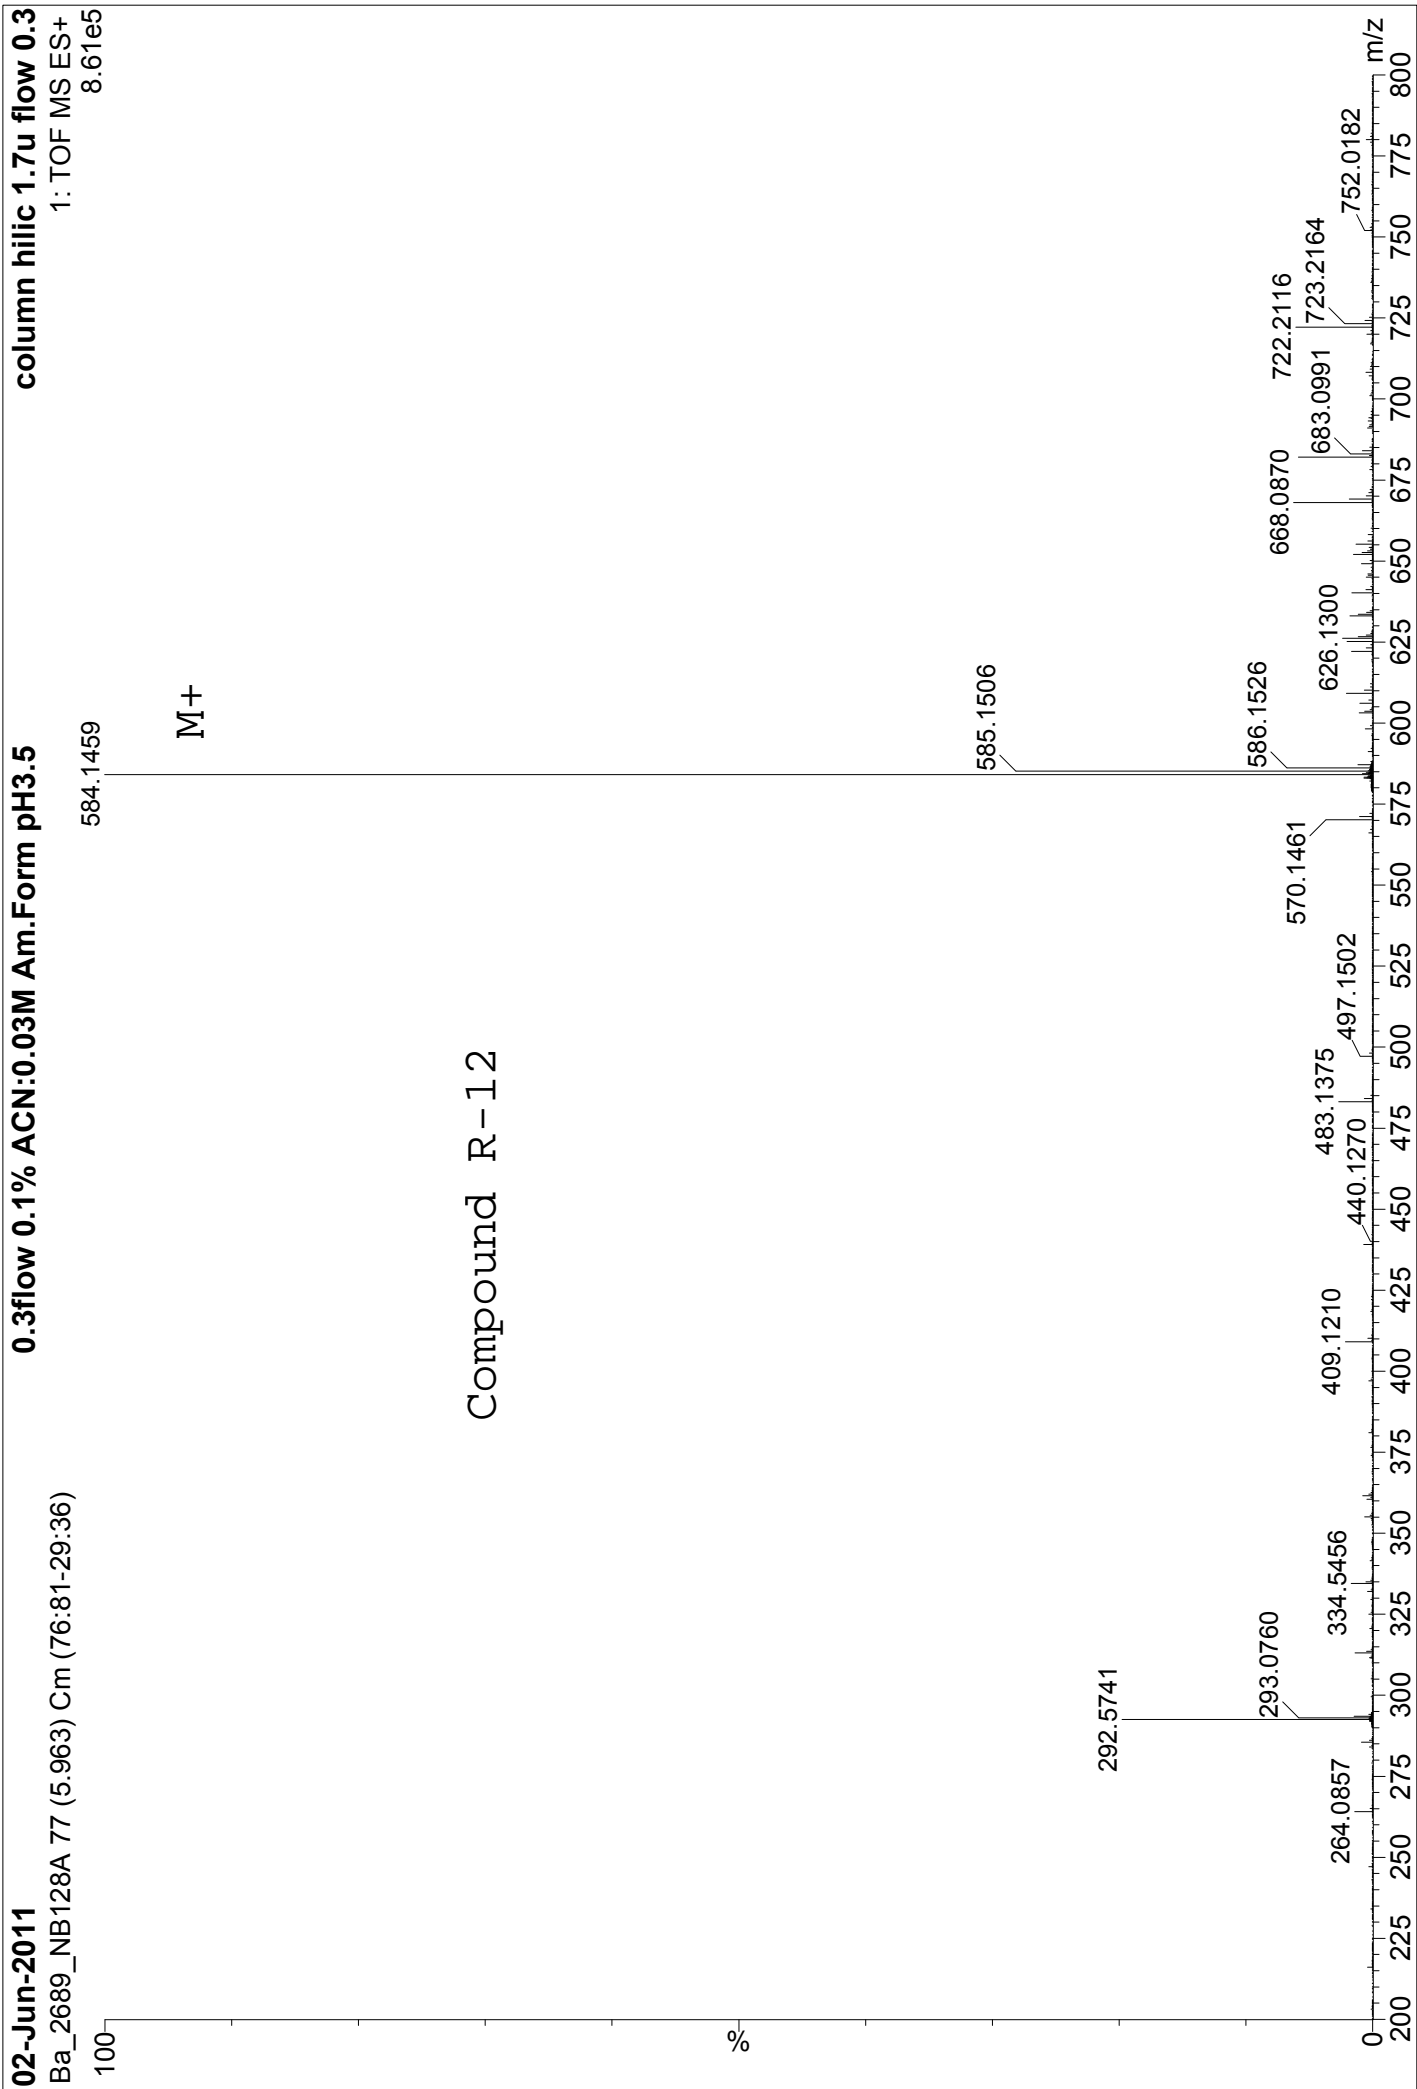

Supplement: NIHMS421657-supplement-1_si_001.pdf [file NIHMS421657-supplement-1_si_001.pdf]
